# Supplementary material
Source: ML conference proceedings conference paper supplement (https://openreview.net/forum?id=r2NuhIUoceq)
Supplement: supplementary_material [file attachment]

(a) Learned vectorfield posterior

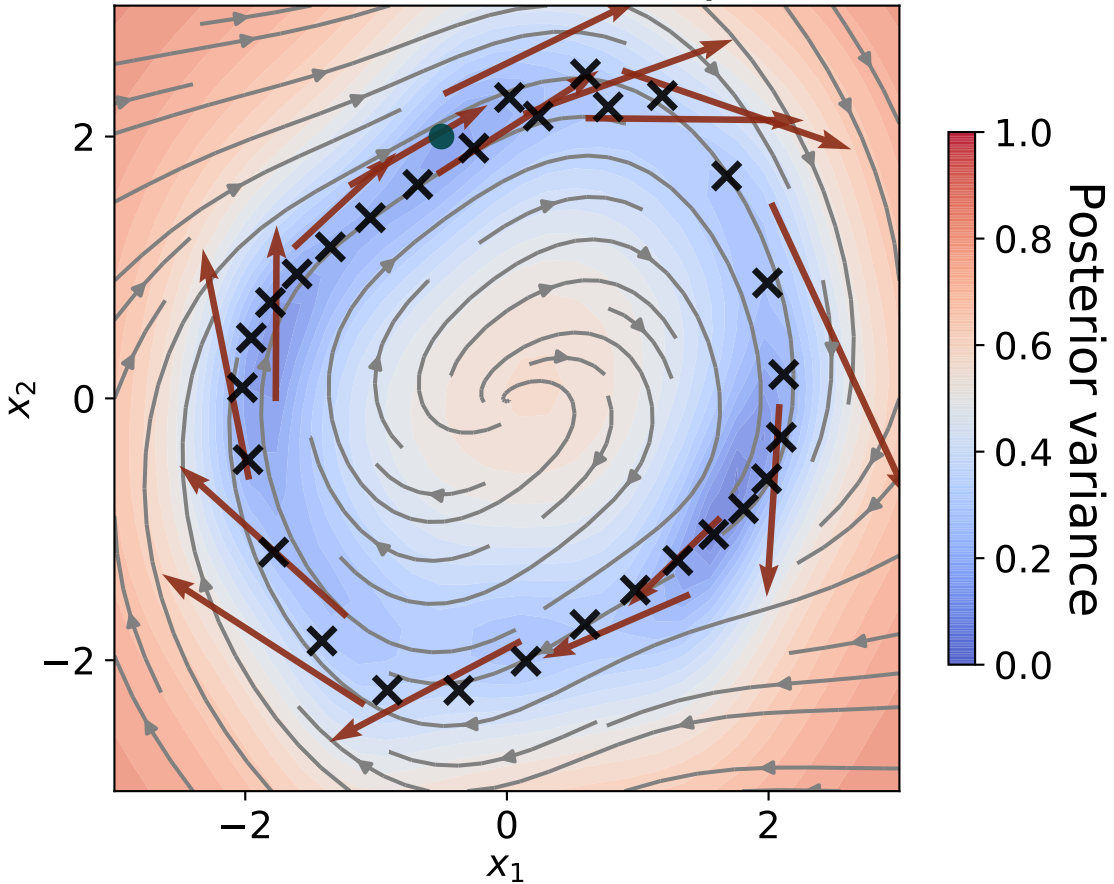

(b) Predictions in the state-space

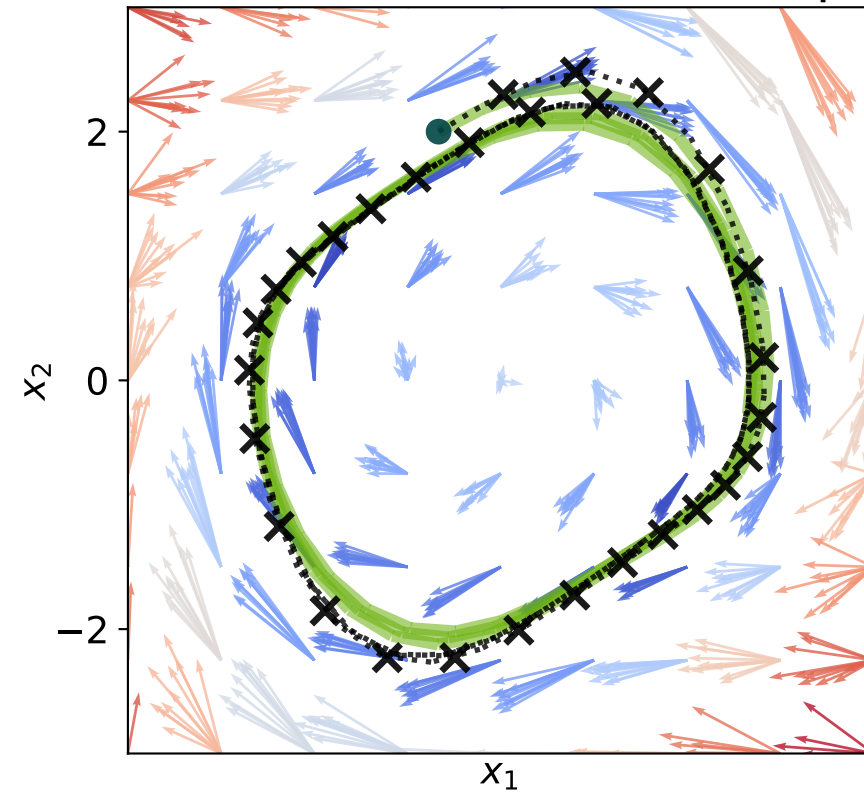

(c) Predictive trajectories over time

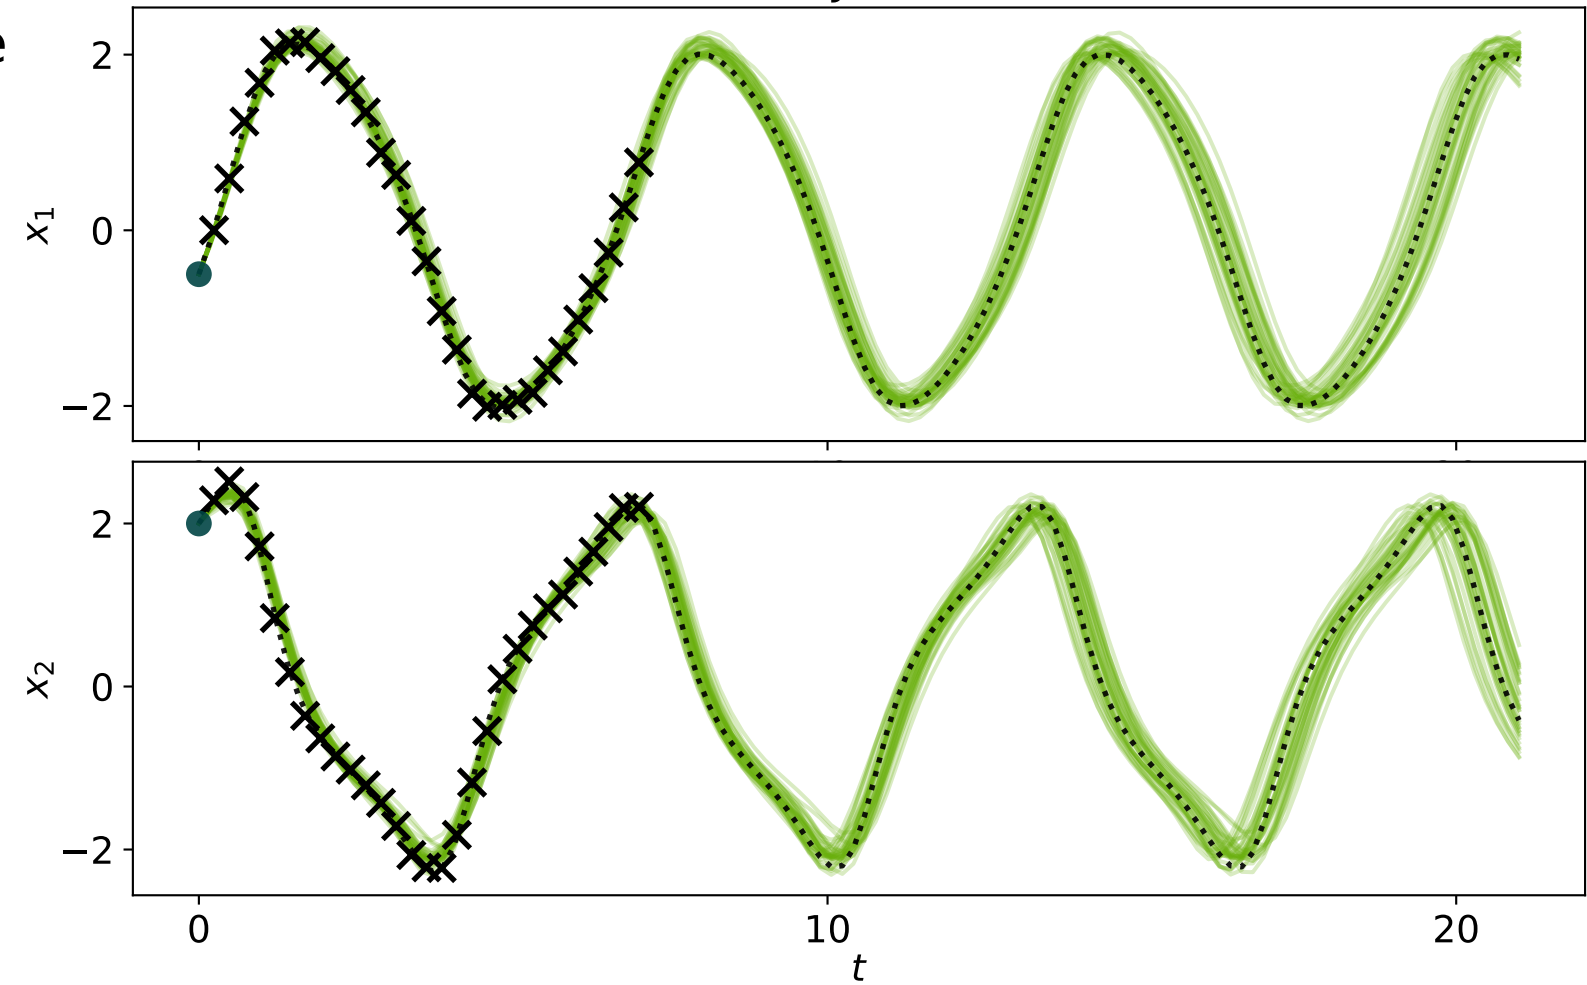

× training observations    → inducing variables    ● initial state    ..... true trajectory    — predictive samples
