# Supplementary material
Source: ML conference proceedings conference paper supplement (https://openreview.net/forum?id=r2NuhIUoceq)

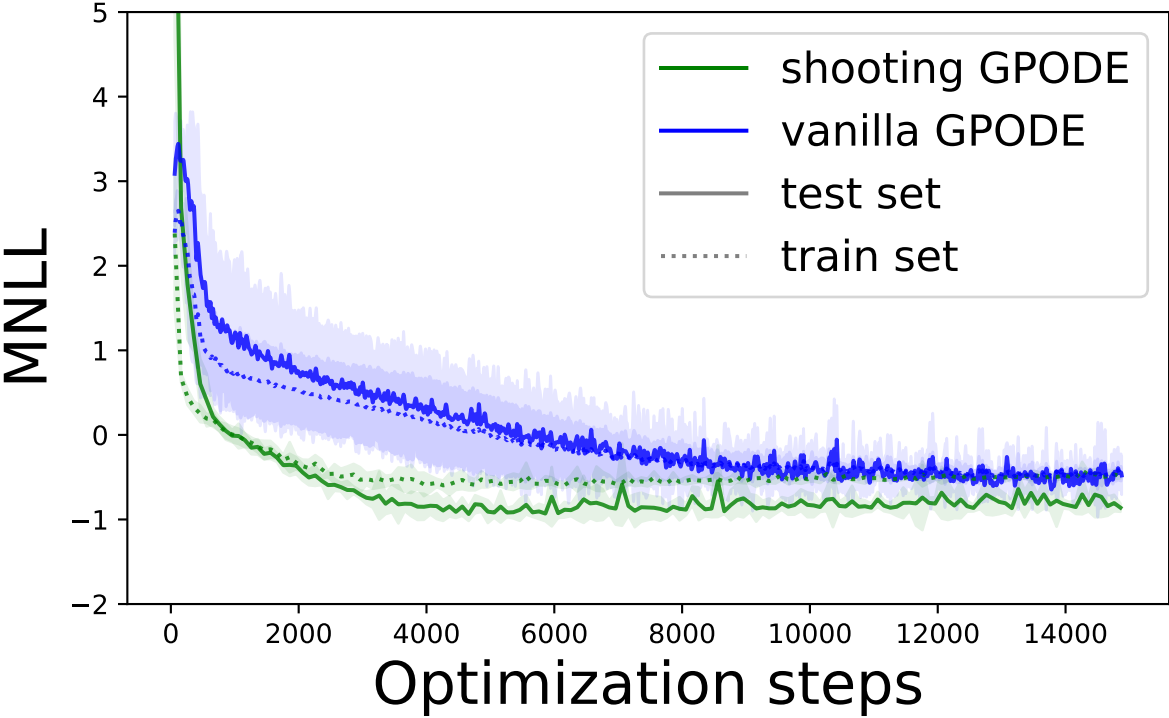

Supplement: supplementary_material [file attachment]

states

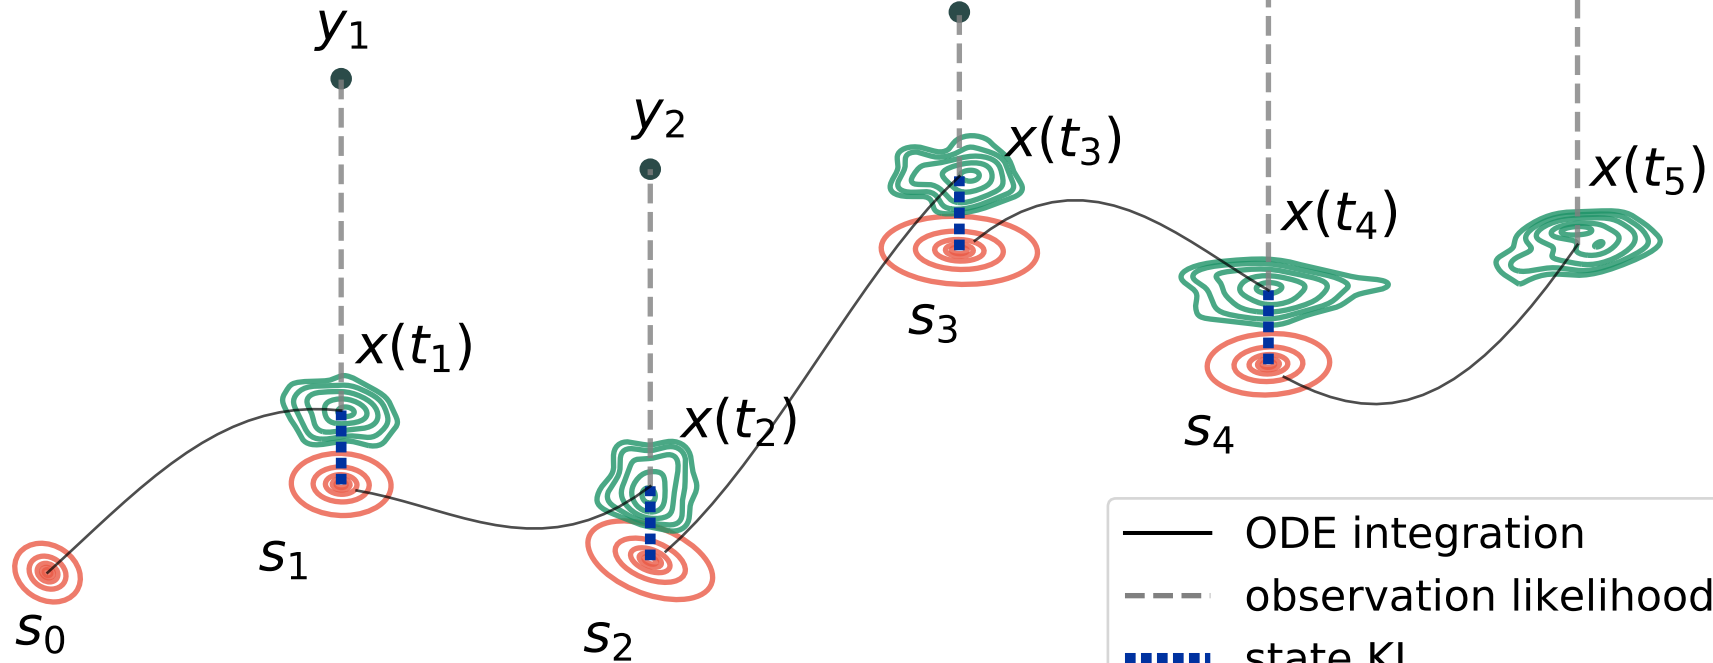

time

Supplement: supplementary_material [file attachment]

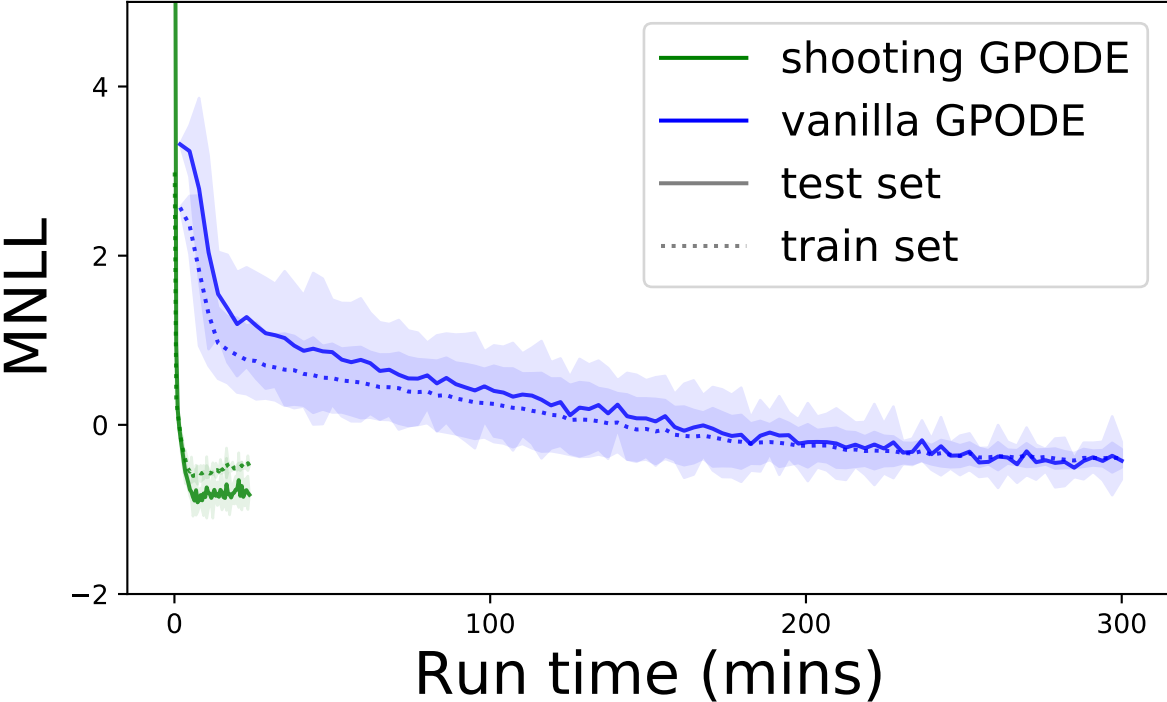

Supplement: supplementary_material [file attachment]

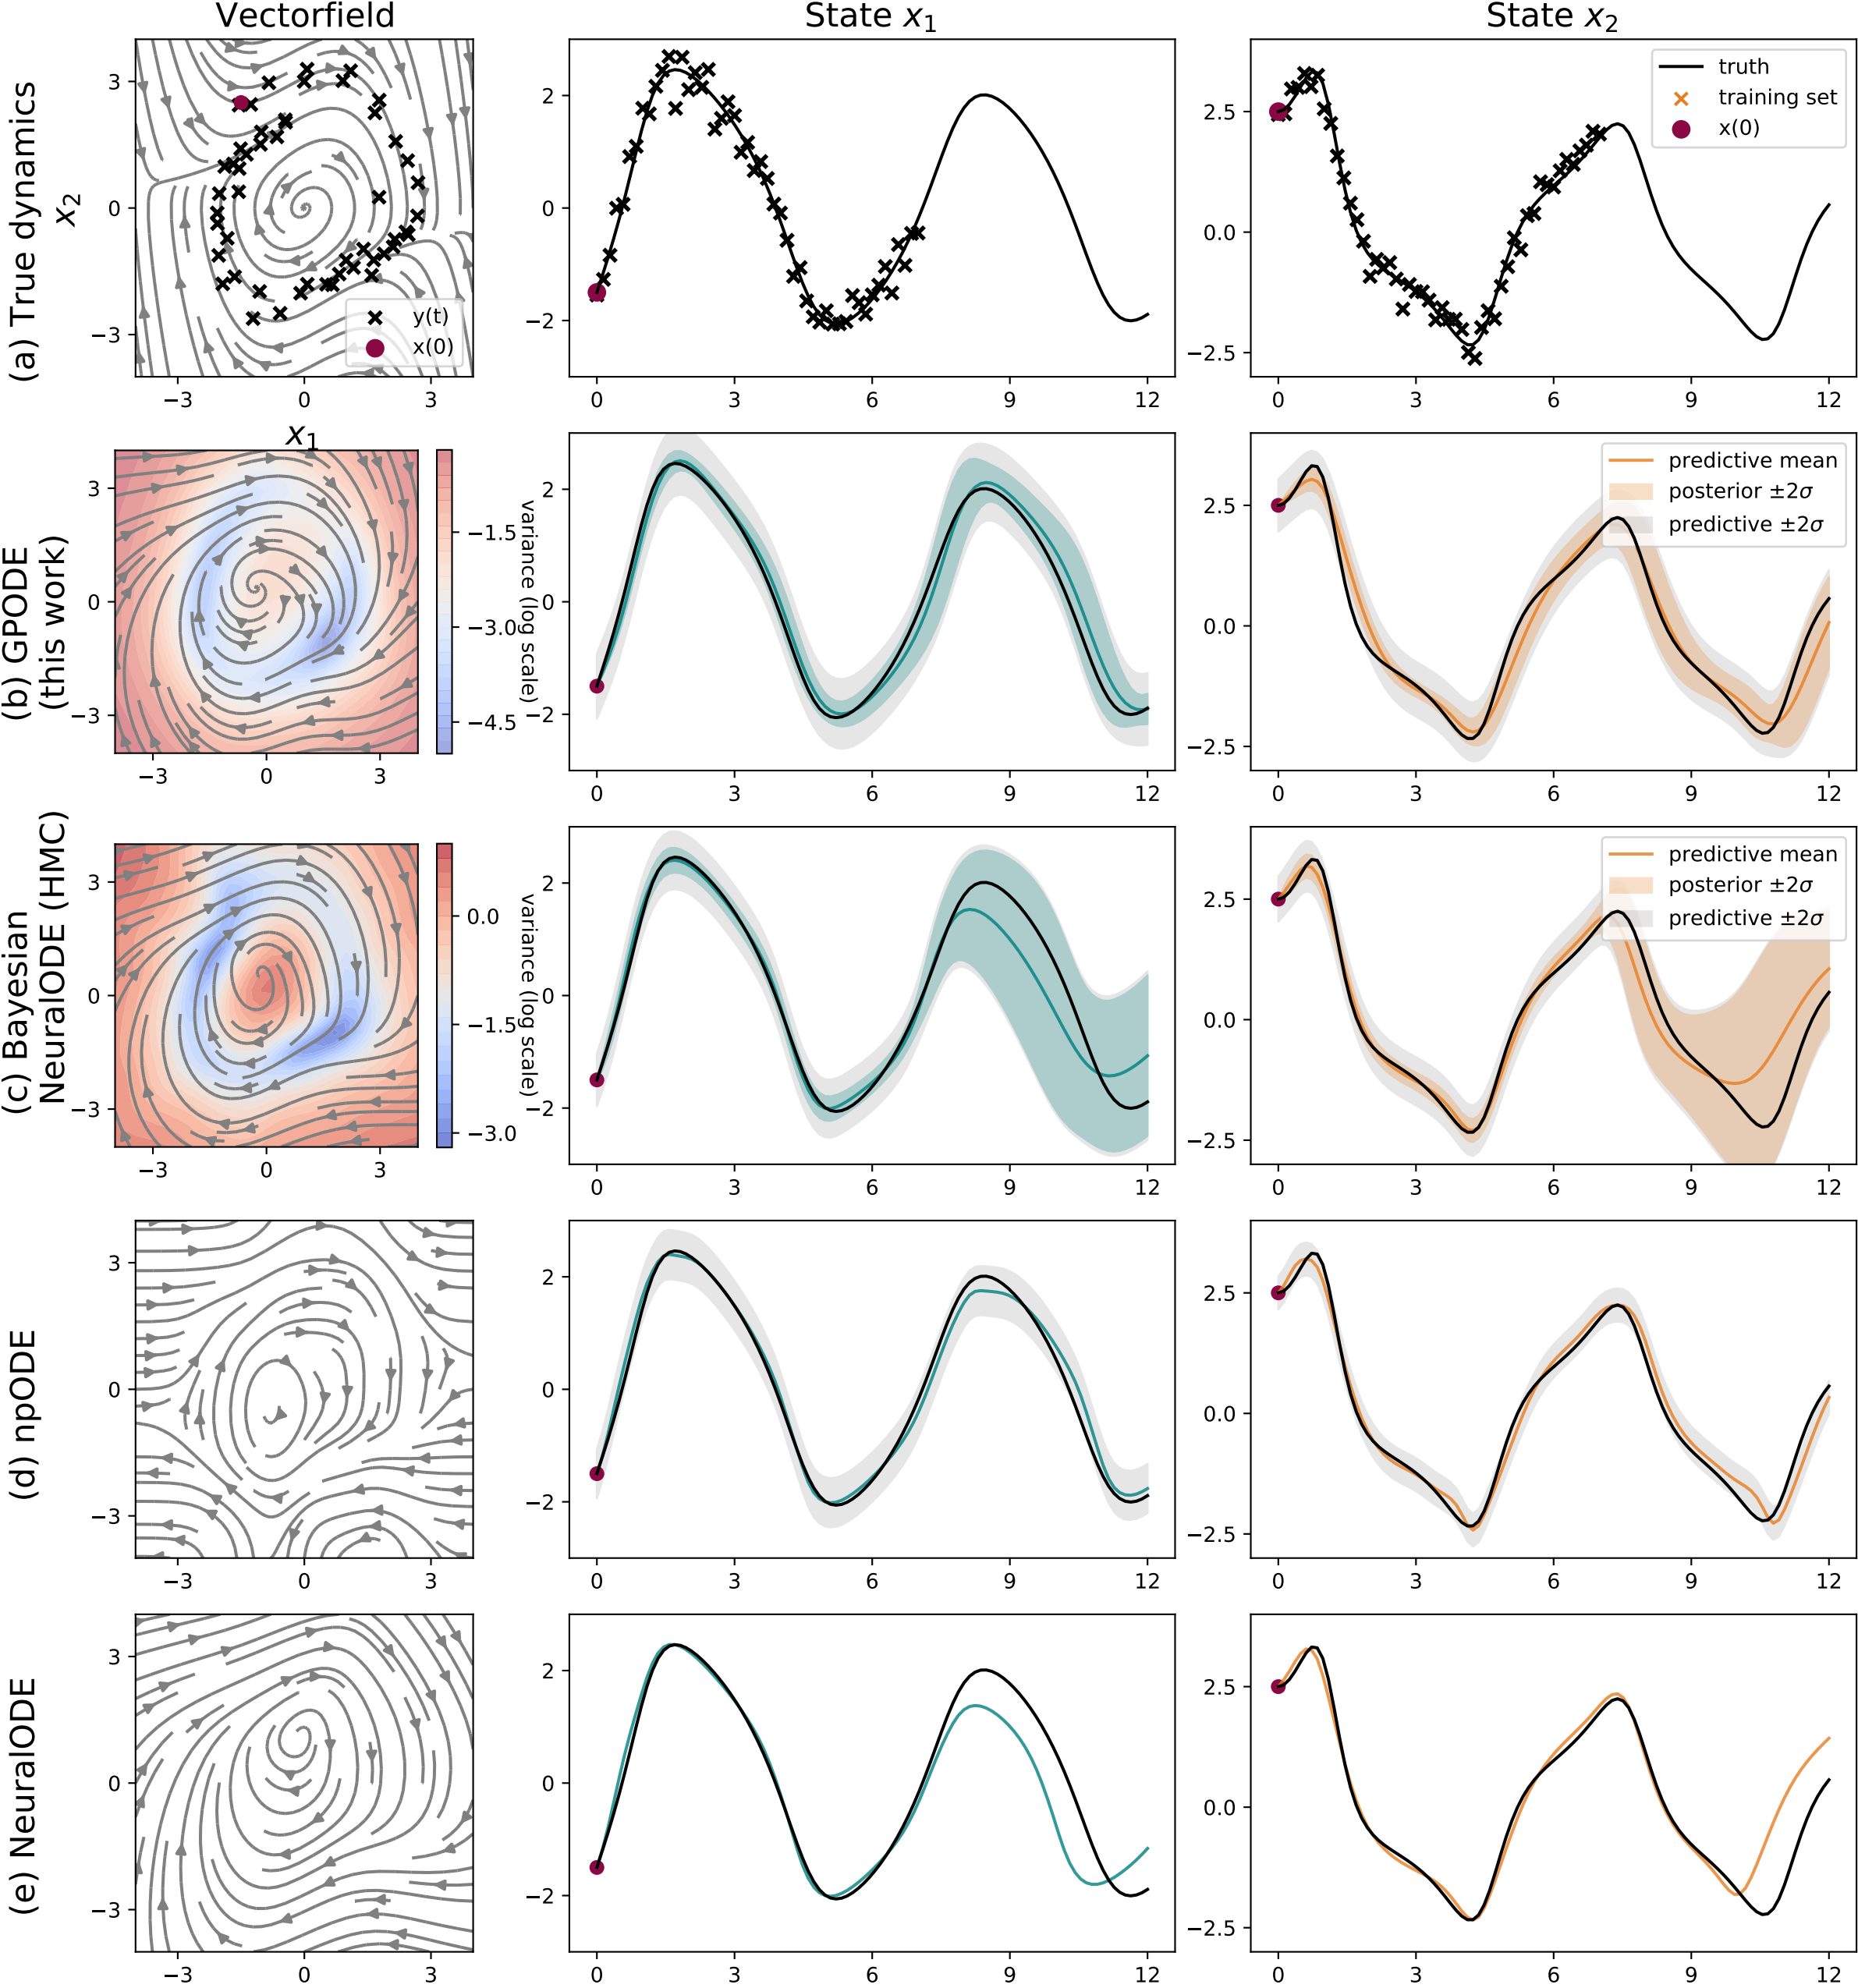

Supplement: supplementary_material [file attachment]

states

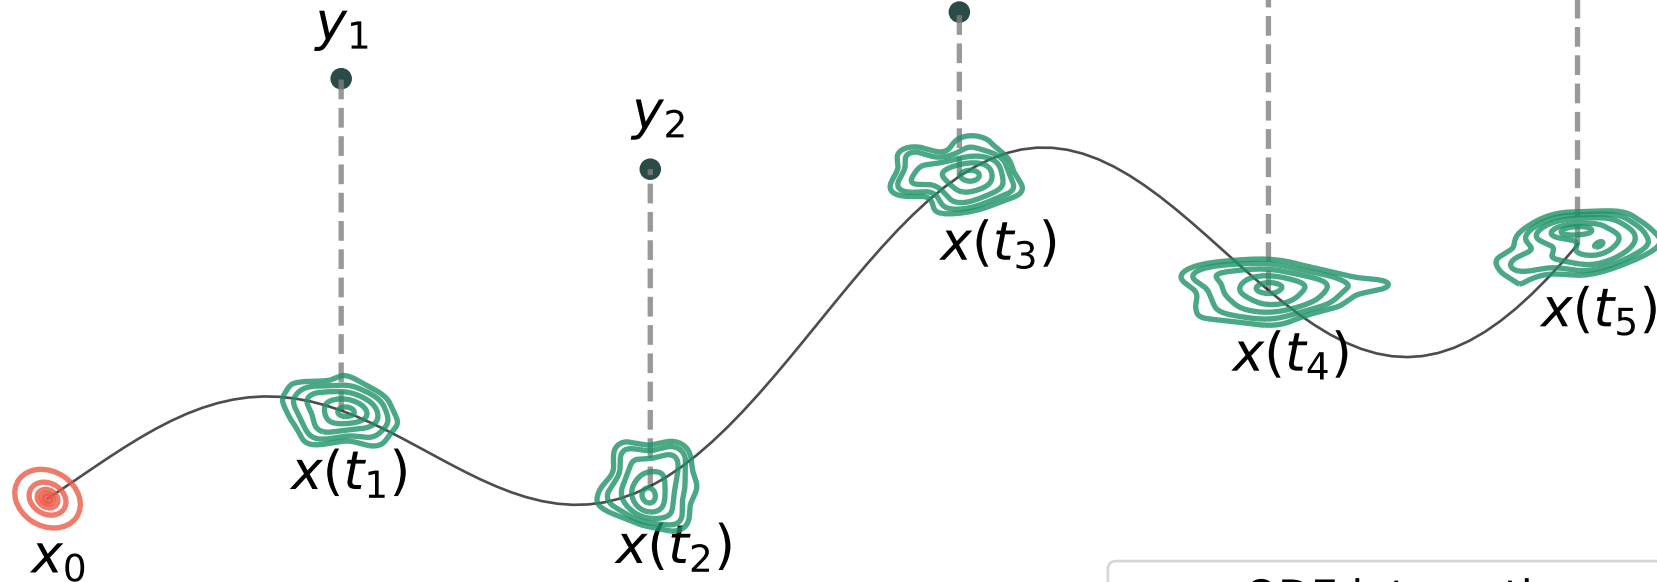

time

Supplement: supplementary_material [file attachment]

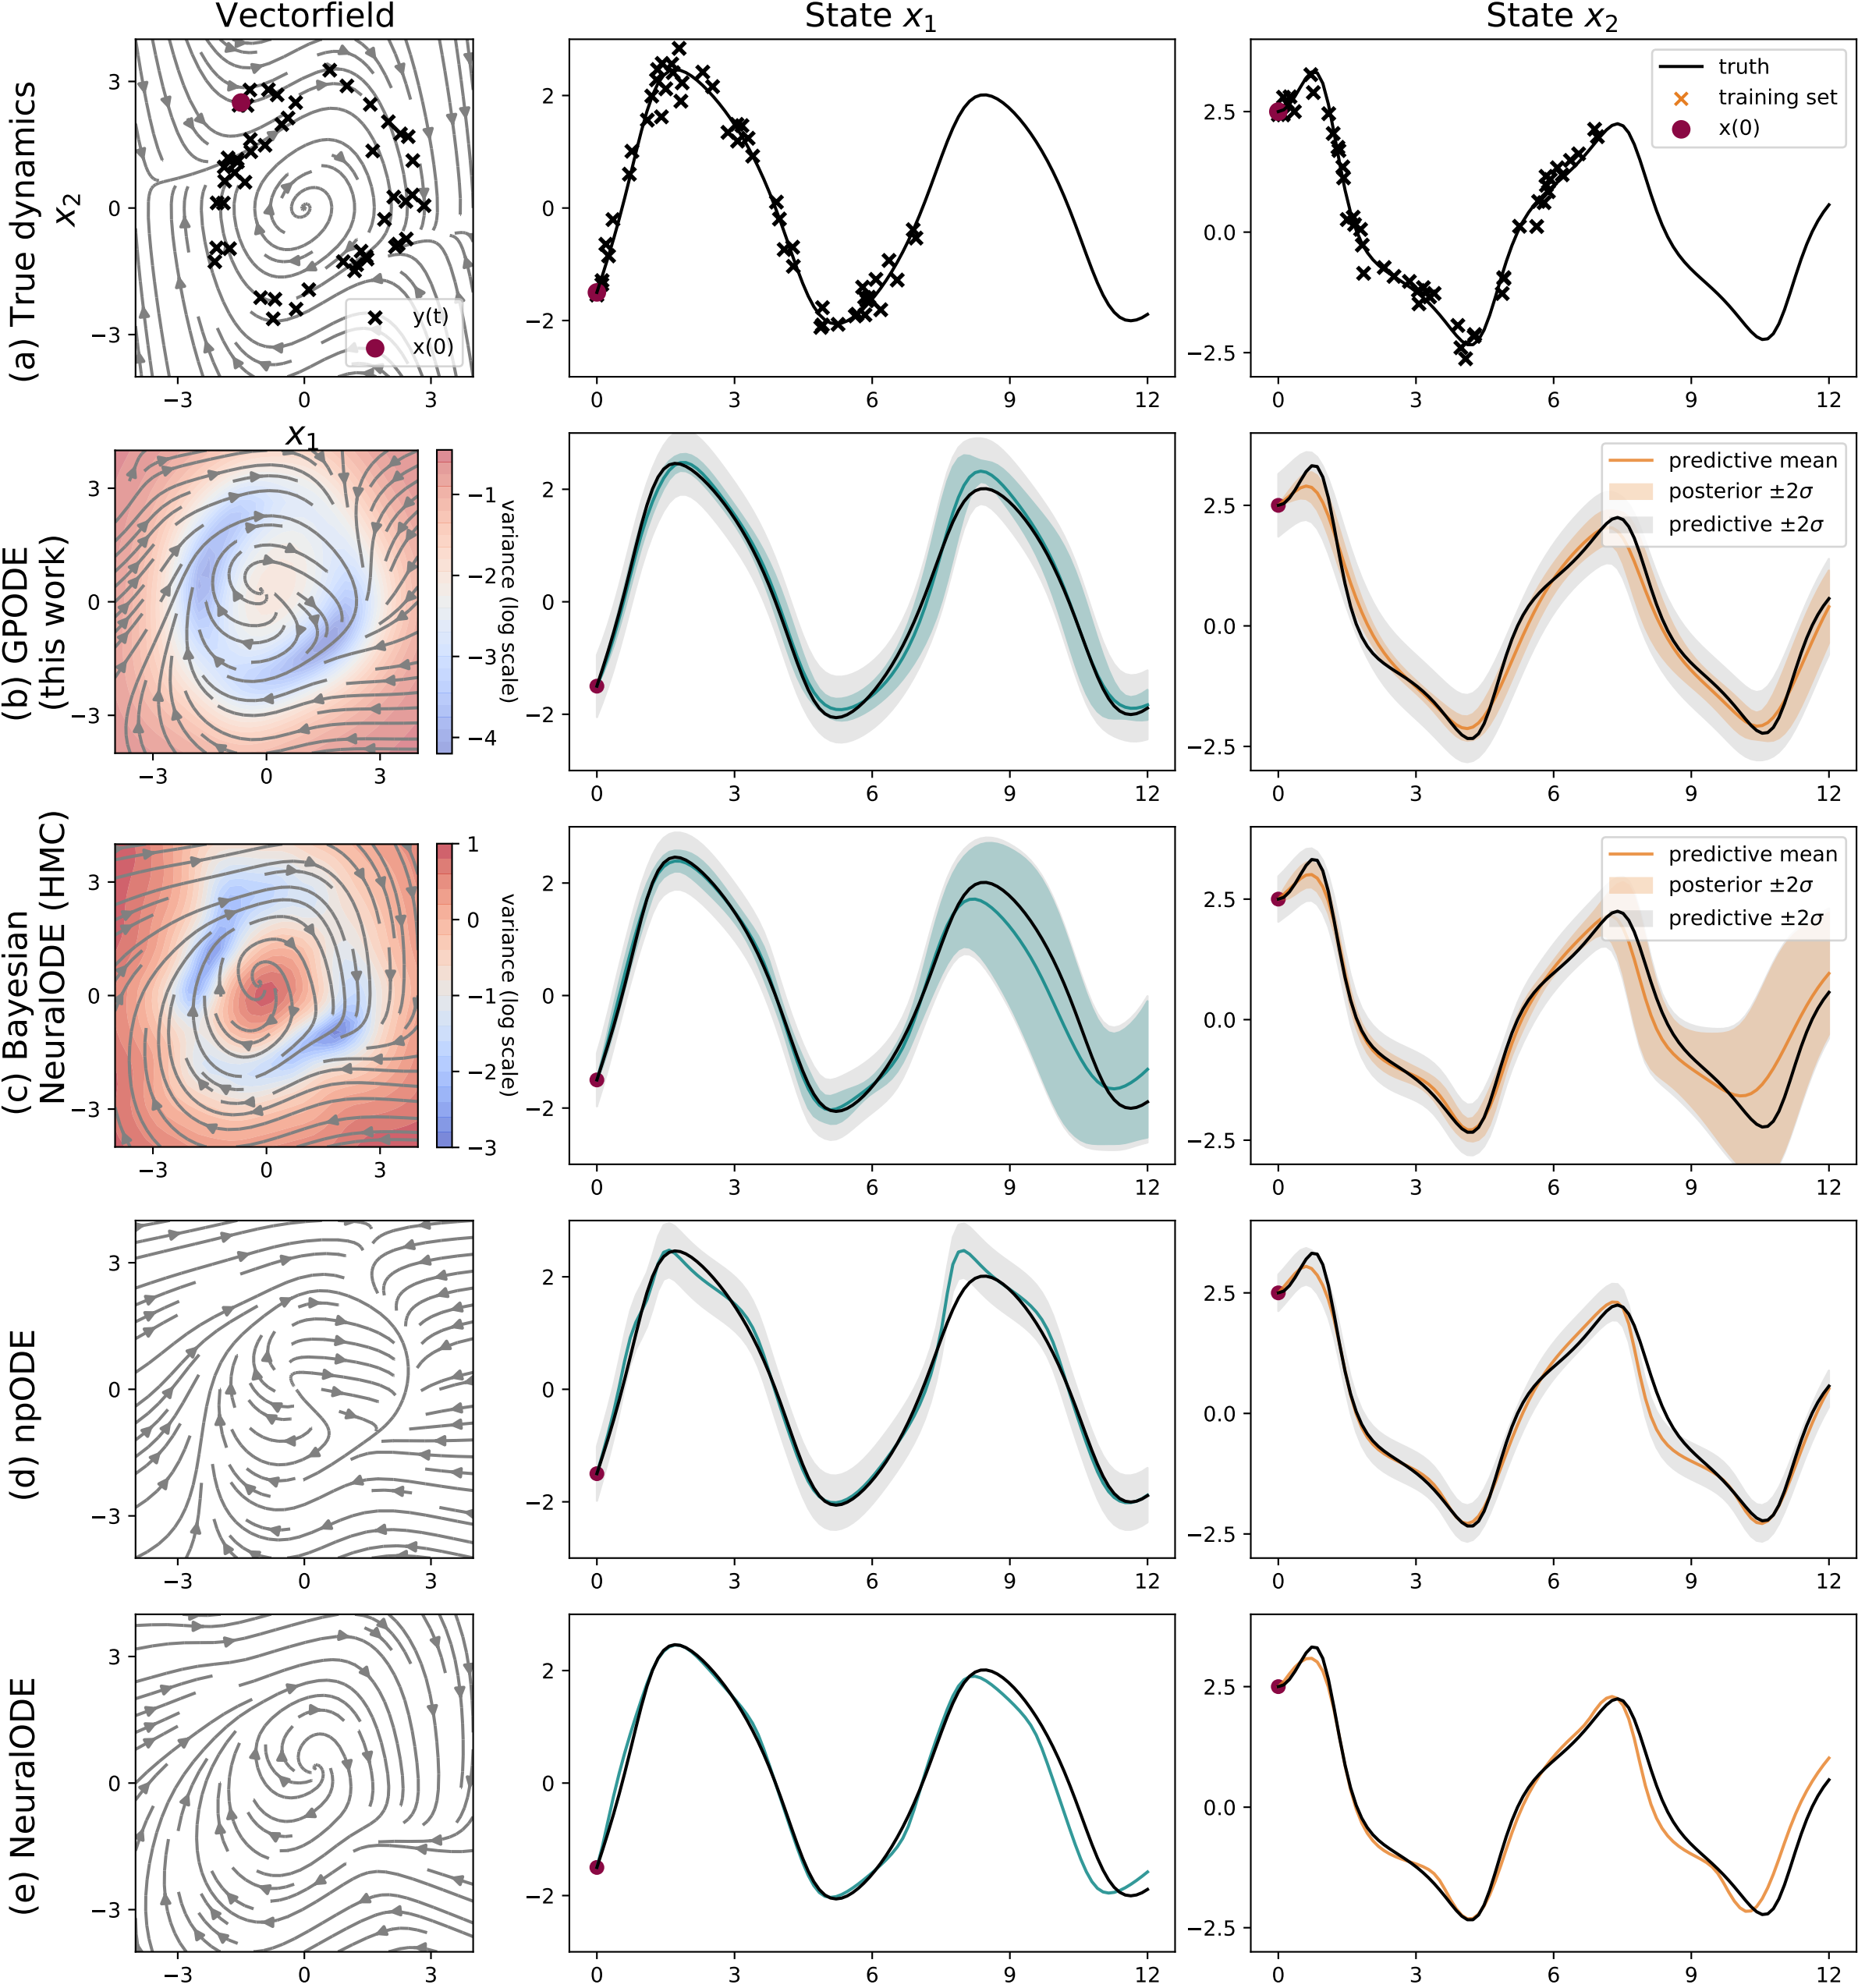

Supplement: supplementary_material [file attachment]

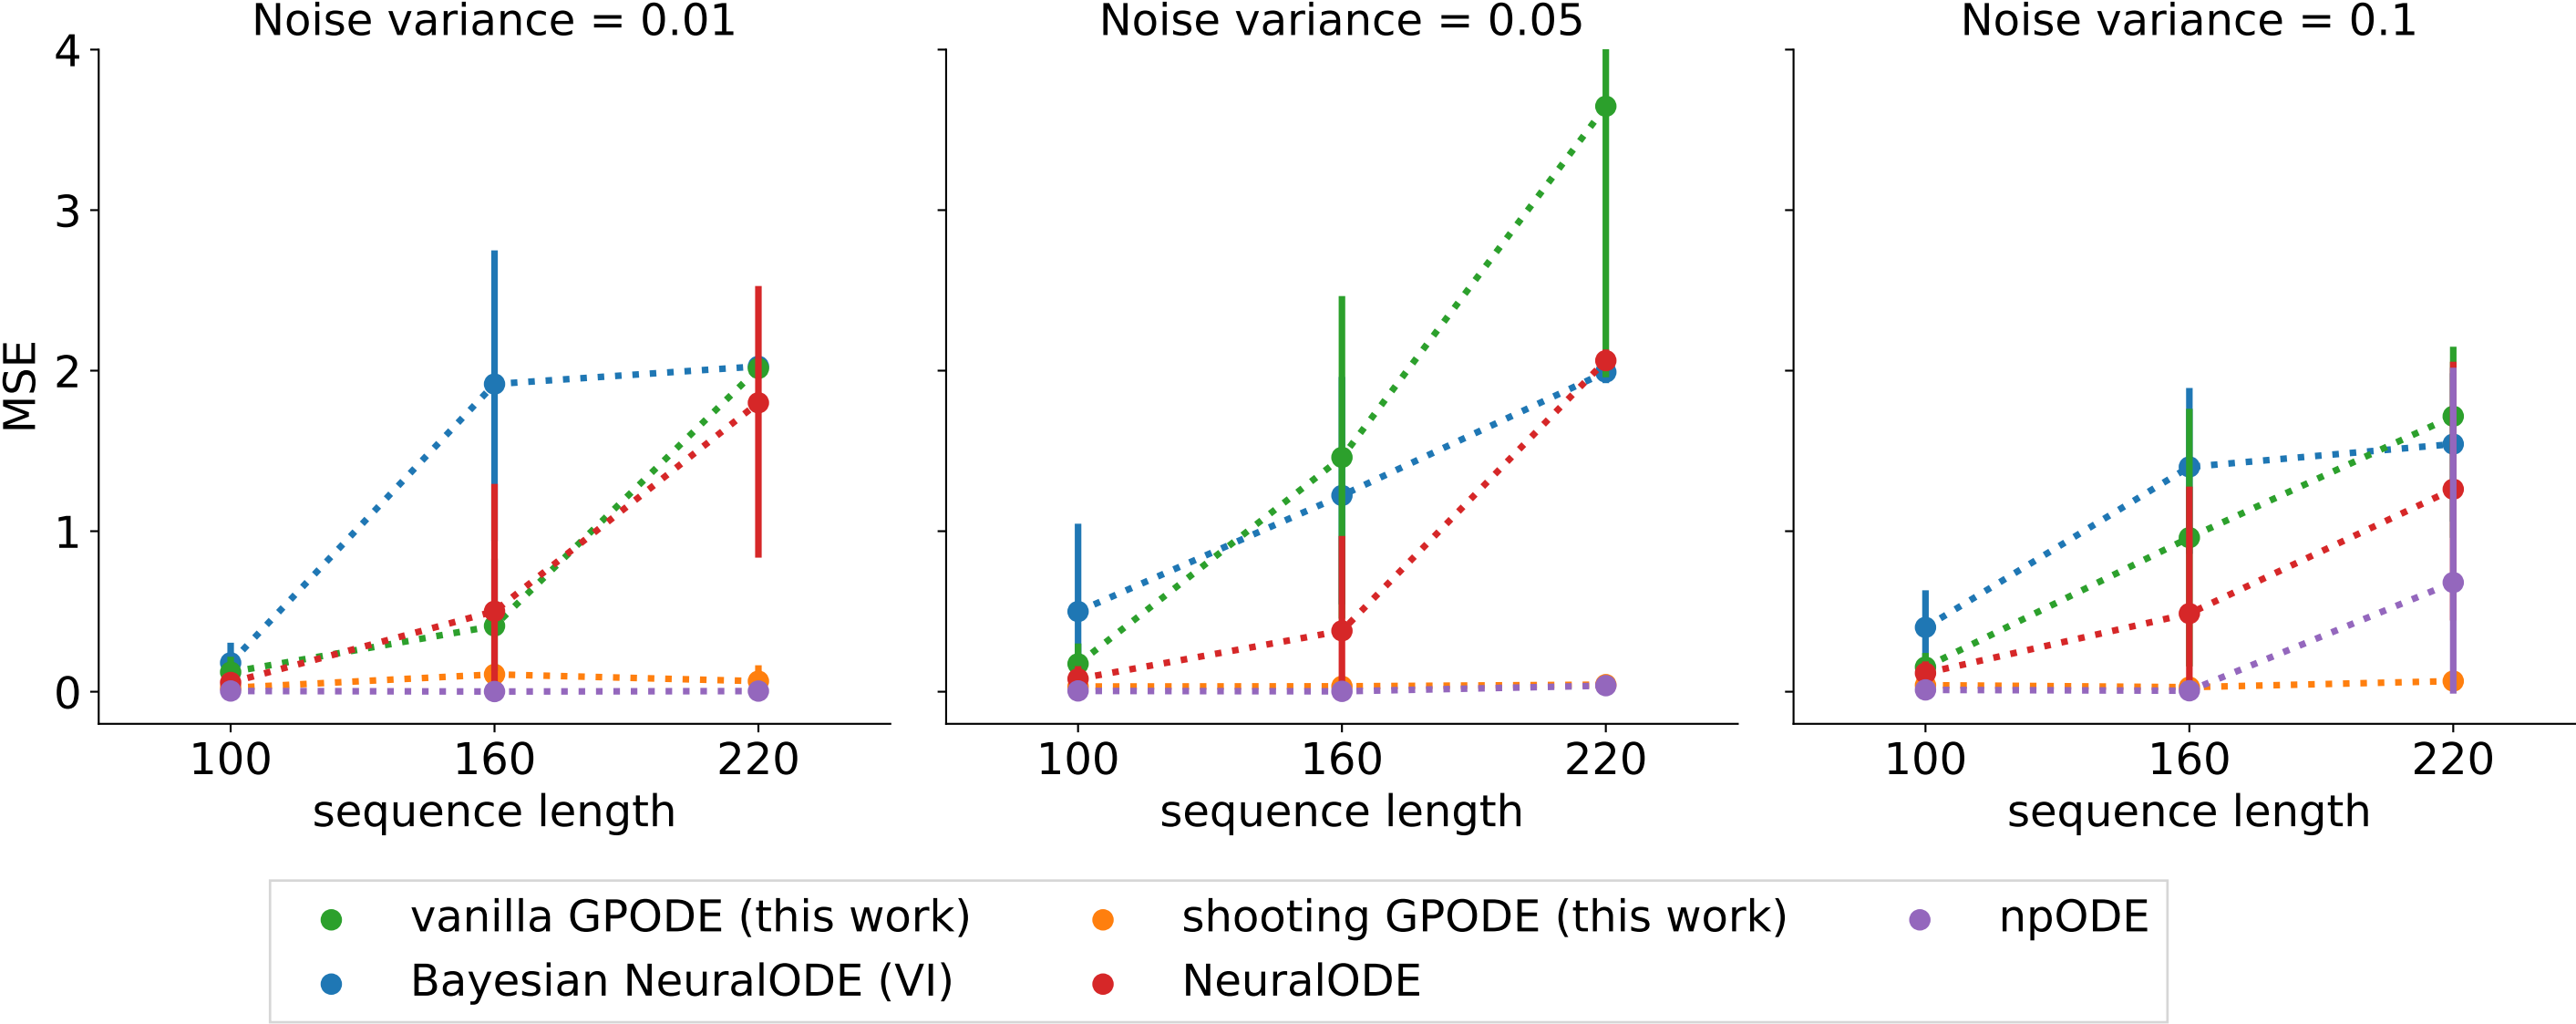

Supplement: supplementary_material [file attachment]

(a) Dynamics in the PCA space

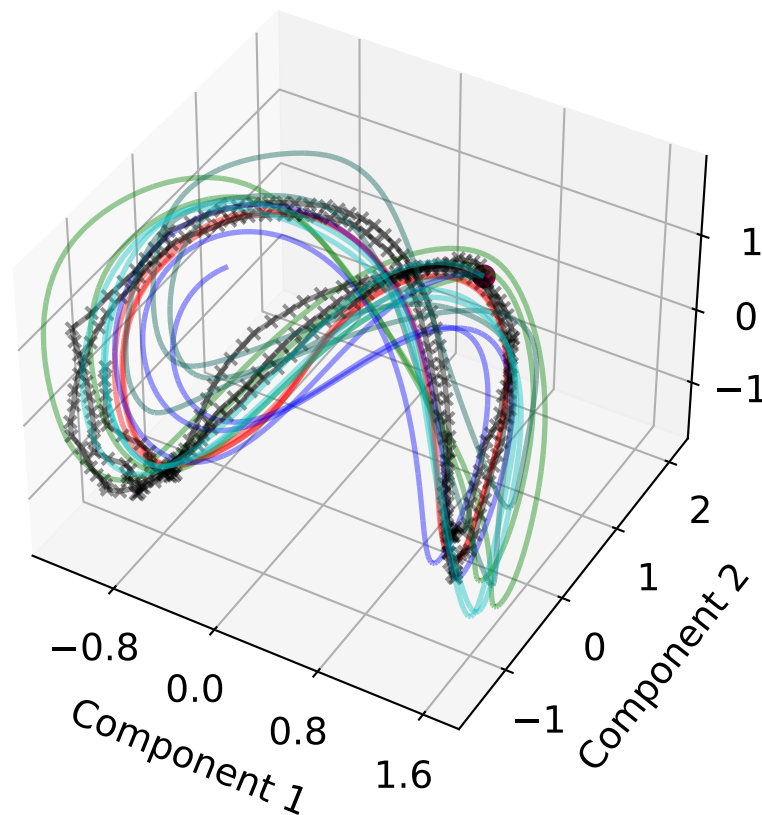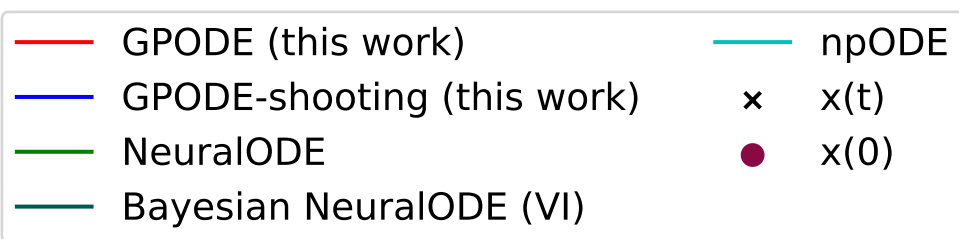

(b) Predictions in the data space

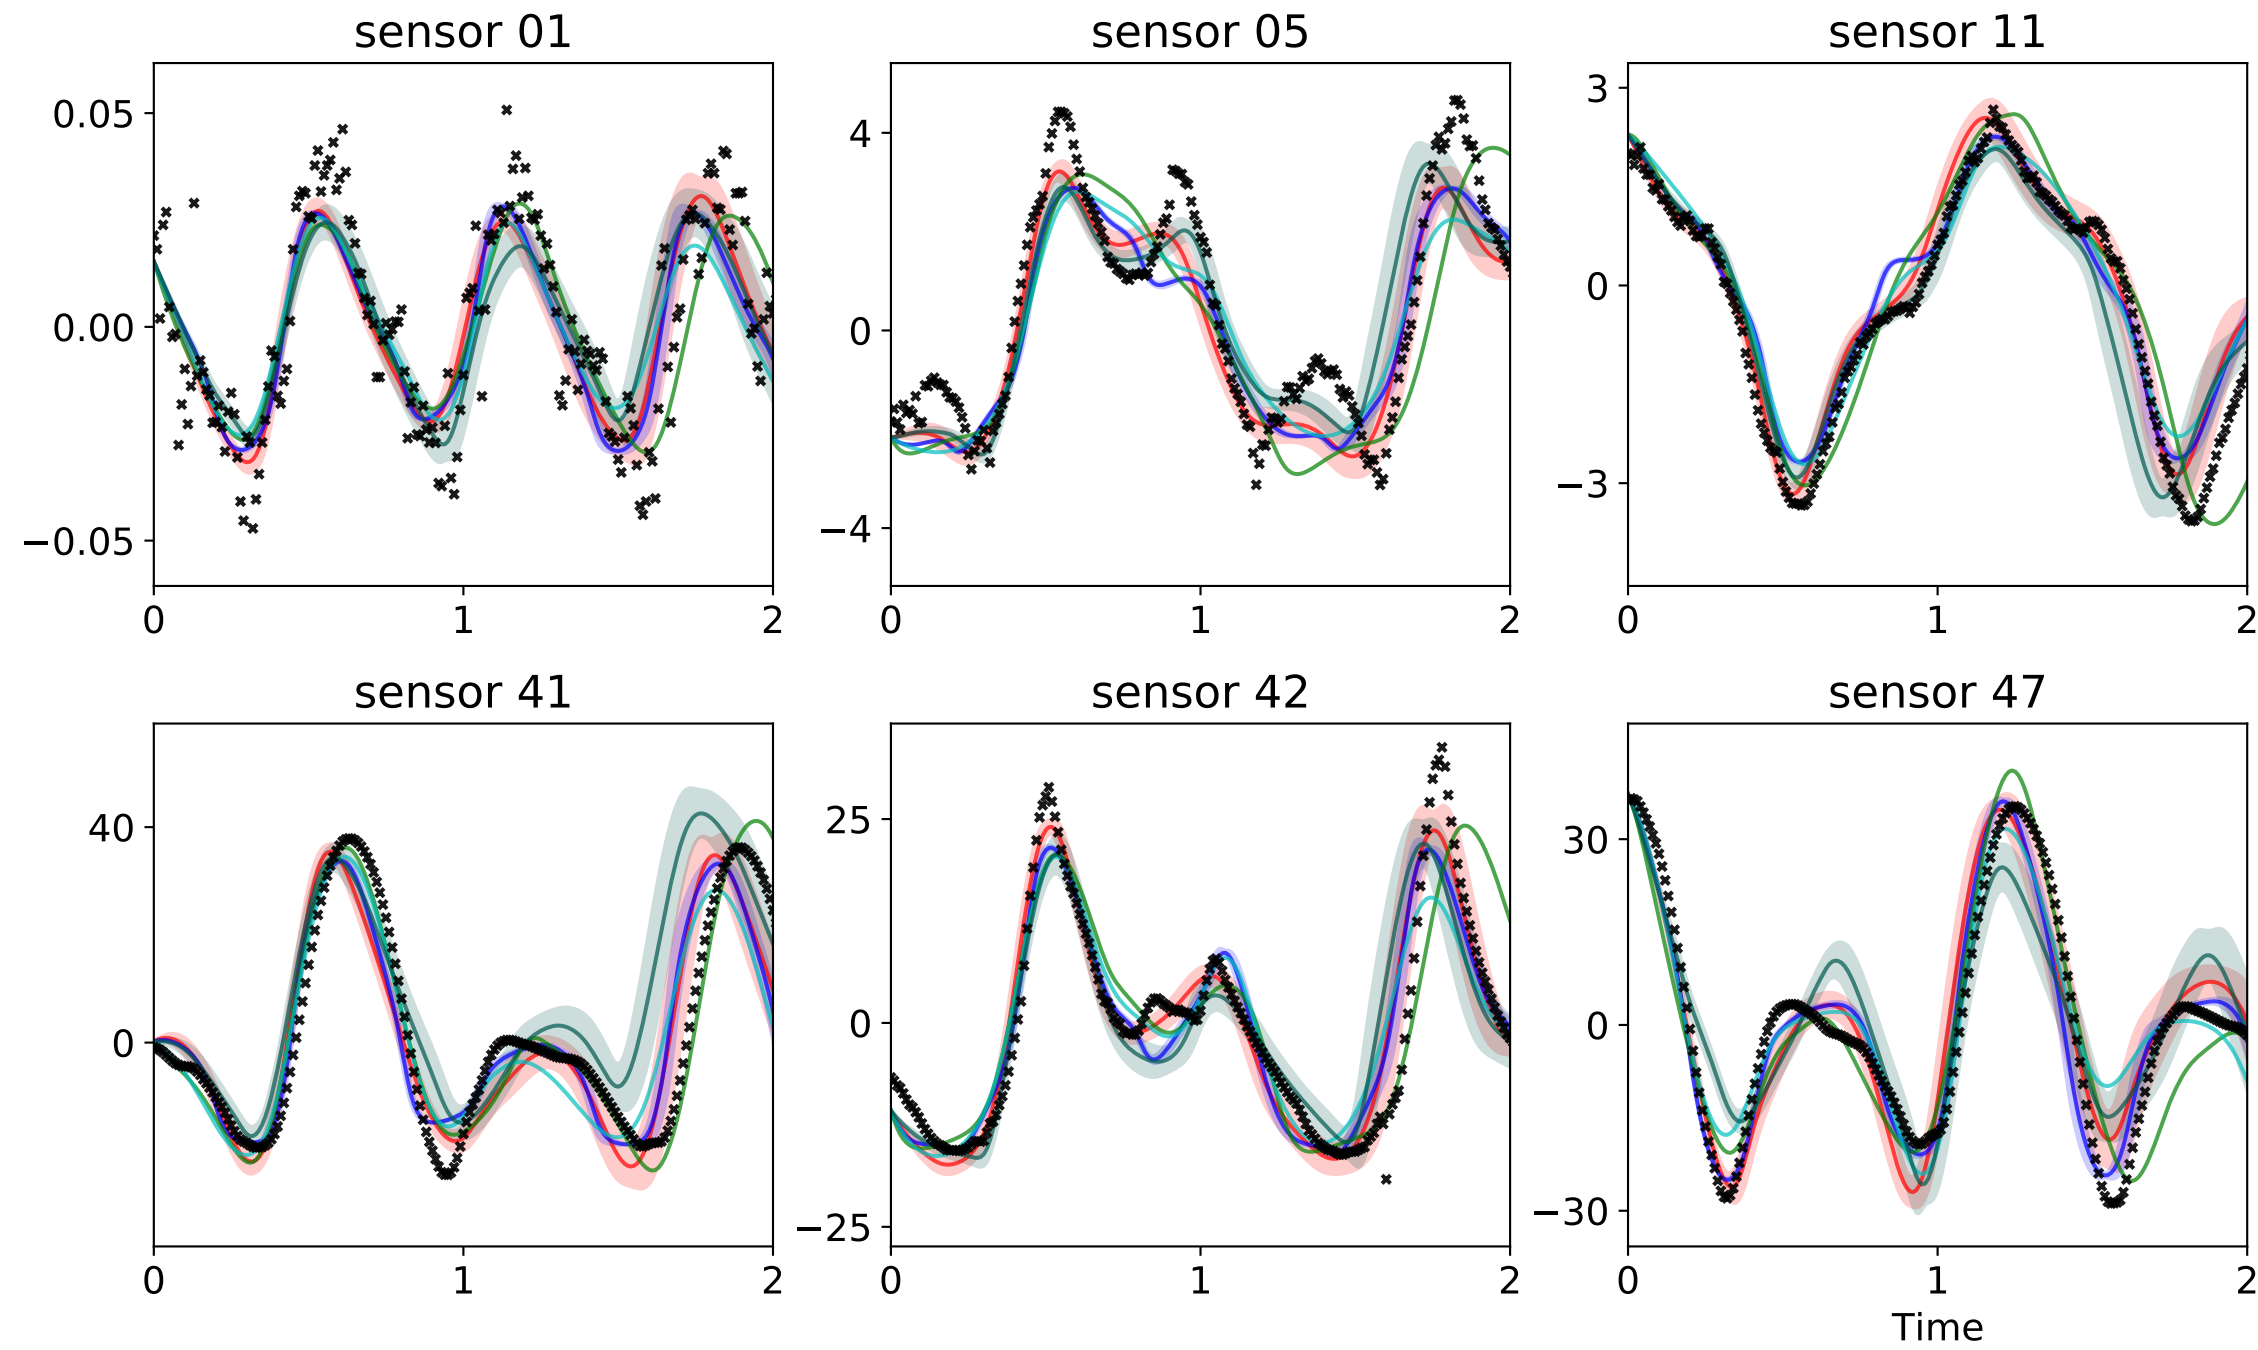

Supplement: supplementary_material [file attachment]
